# Supplementary material for: Photo-reduced Cu/CuO nanoclusters on TiO2 nanotube arrays as highly efficient and reusable catalyst
Source: PubMed Central journal article supplement (PMC5223138; doi:10.1038/srep39695), 2017-01-10
Supplement: srep39695-s1.pdf [file srep39695-s1.pdf]

## Supporting information

# Photo-reduced Cu/CuO nanoclusters on TiO<sub>2</sub> nanotube arrays as highly efficient and reusable catalyst

Zhao Jin, Chang Liu, Kun Qi, Xiaoqiang Cui\*

*Department of Materials Science, State Key Laboratory of Automotive Simulation and Control, and Key Laboratory of Automobile Materials of MOE, Jilin University, Changchun 130012, People's Republic of China.*

\*Corresponding Author: Xiaoqiang Cui (e-mail address: xqcui@jlu.edu.cn)

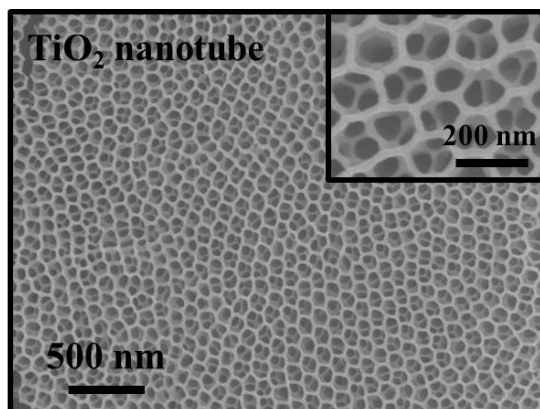

**Figure S1.** SEM characterization of TiO<sub>2</sub> nanotube arrays without Cu/CuO decoration. Inset shows the high magnification image.

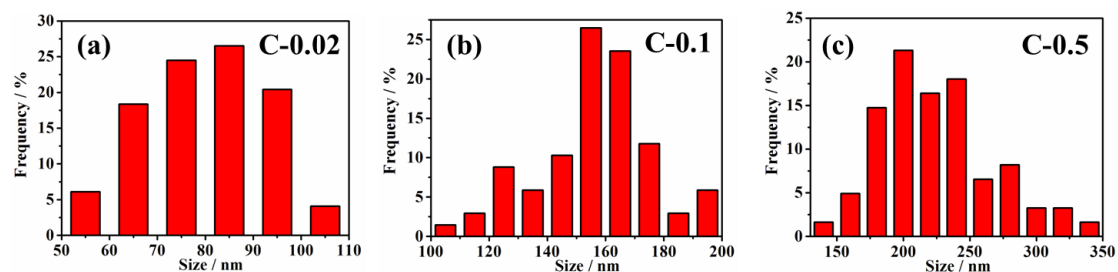

**Figure S2.** Cu/CuO nanoclusters size distributions of different catalysts: (a) C-0.02, (b) C-0.1 and (c) C-0.5 with average size of 81 nm, 158 nm and 223 nm, respectively.

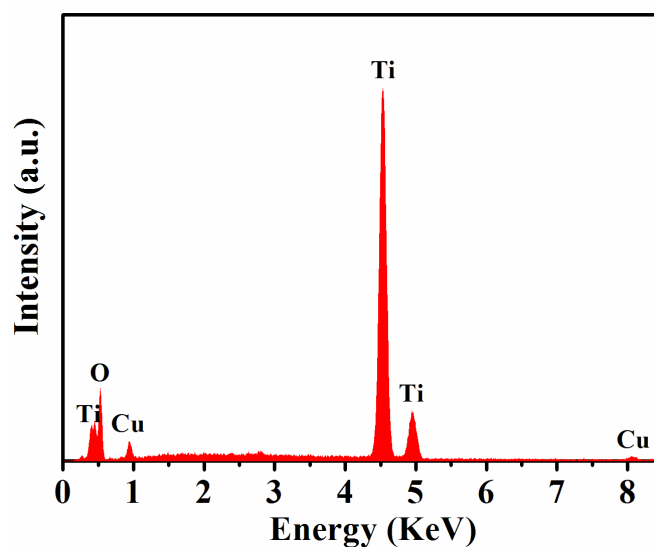

**Figure S3.** EDS spectrum of catalyst C-0.1.

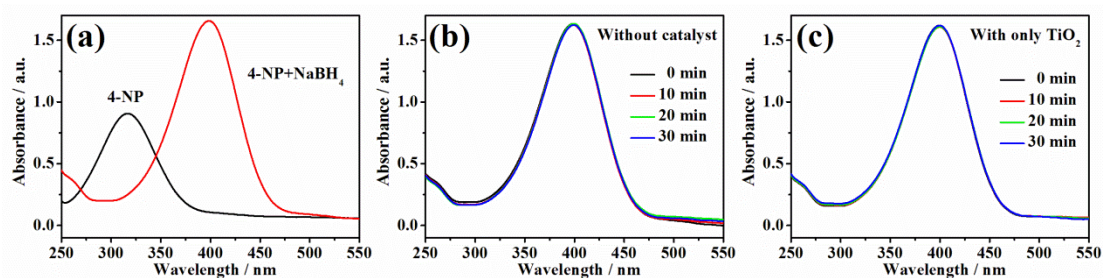

**Figure S4.** (a) UV-vis absorption spectra of 4-NP with and without NaBH<sub>4</sub>; Time-dependent UV-vis absorption spectra of 4-NP with NaBH<sub>4</sub> but without catalyst (b) and with TiO<sub>2</sub> substrate (c).

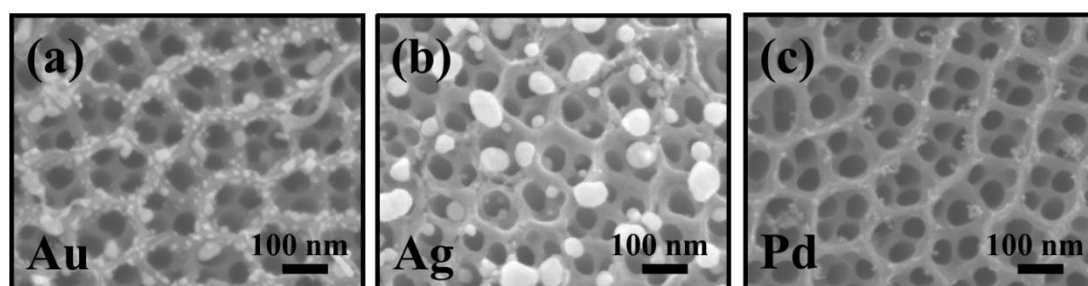

**Figure S5.** SEM images of TiO<sub>2</sub> substrate with different metal nanoparticles: (a) Au-TiO<sub>2</sub>; (b) Ag-TiO<sub>2</sub> and (c) Pd-TiO<sub>2</sub>;

**Table S1. Comparison of different catalysts for 4-NP reduction.**

| Catalyst            | 4-NP(M)              | NaBH <sub>4</sub> (M) | K(s <sup>-1</sup> )   | Ref.      |
|---------------------|----------------------|-----------------------|-----------------------|-----------|
| C-0.1               | 1.0×10 <sup>-4</sup> | 1.0×10 <sup>-2</sup>  | 13.6×10 <sup>-3</sup> | This work |
| Au-TiO <sub>2</sub> | 1.0×10 <sup>-4</sup> | 1.0×10 <sup>-2</sup>  | 1.5×10 <sup>-3</sup>  | This work |
| Ag-TiO <sub>2</sub> | 1.0×10 <sup>-4</sup> | 1.0×10 <sup>-2</sup>  | 1.3×10 <sup>-3</sup>  | This work |
| Pd-TiO <sub>2</sub> | 1.0×10 <sup>-4</sup> | 1.0×10 <sup>-2</sup>  | 2.7×10 <sup>-3</sup>  | This work |
| SiNWAs-Cu           | 1.0×10 <sup>-4</sup> | 1.1×10 <sup>-2</sup>  | 10.5×10 <sup>-3</sup> | 26        |
| Au-PMMA             | -                    | -                     | 1.6×10 <sup>-3</sup>  | 8         |
| Ag-PMMA             | -                    | -                     | 0.8×10 <sup>-3</sup>  | 8         |
| Porous Cu           | 1.0×10 <sup>-3</sup> | 1.0×10 <sup>-1</sup>  | 8.9×10 <sup>-3</sup>  | 36        |
| Porous Cu/Ag        | 1.0×10 <sup>-3</sup> | 1.0×10 <sup>-1</sup>  | 19.0×10 <sup>-3</sup> | 36        |
| PAu                 | 2.0×10 <sup>-3</sup> | 2.0×10 <sup>-1</sup>  | 0.5×10 <sup>-3</sup>  | 10        |
| Pd-dendrite/PAu     | 2.0×10 <sup>-3</sup> | 2.0×10 <sup>-1</sup>  | 1.0×10 <sup>-3</sup>  | 10        |

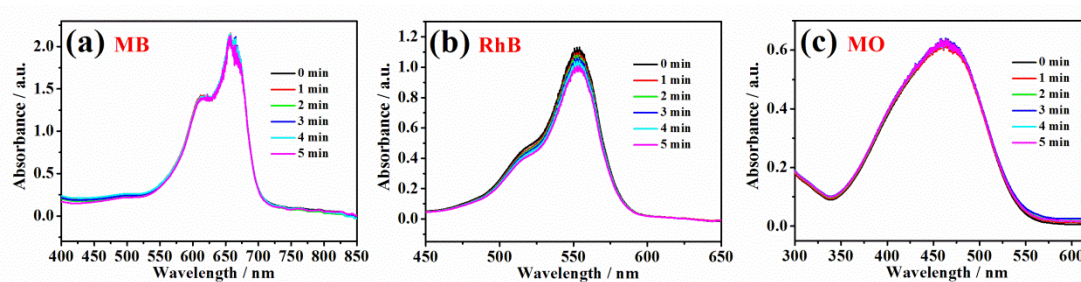

**Figure S6.** Time-dependent UV-vis absorption spectra for (a) MB; (b) RhB and (c) MO without catalysts.

### Calculation of turnover frequency (TOF):

TOF is defined as the moles of reduced 4-NP molecules per mole of catalyst atom per hour. The total mass of Cu on C-0.1 is calculated as 0.0024 mg according to the inductively coupled plasma-optical emission spectrophotometry (ICP-OES). Hence, the molar ratio of 4-NP/Cu is about 6.7. The reaction time for C-0.1 is nearly 3.5 min. As a result, the final TOF is calculated as  $115 \text{ h}^{-1}$ .
